# Supplementary material for: Novel fluorescence-based method for rapid quantification of live bacteria in river water and treated wastewater
Source: Royal Society of Chemistry journal article supplement (doi:10.1039/d1va00017a), 2021-11-03
Supplement: d1va00017a1.pdf [file d1va00017a1.pdf]

Supplementary information

**Novel Fluorescence-Based Method for Rapid Quantification of Live  
Bacteria in River Water and Treated Wastewater**

Manna Wang<sup>1</sup>, Mohamed Ateia<sup>2,3,\*</sup>, Yuta Hatano<sup>1</sup>, Kazuhiko Miyanaga<sup>4</sup>, Chihiro Yoshimura<sup>1,\*</sup>

<sup>1</sup>*Department of Civil and Environmental Engineering, Tokyo Institute of Technology, Tokyo 152-8552, Japan*

<sup>2</sup>*Department of Chemistry, Northwestern University, Evanston, Illinois 60208, USA*

<sup>3</sup>*United States Environmental Protection Agency, Center for Environmental Solutions & Emergency Response, Cincinnati, OH, USA*

<sup>4</sup>*Department of Life Science and Technology, Tokyo Institute of Technology, Yokohama 226-8501, Japan*

\*Corresponding authors: [M.A.] Ibrahim.mohamed@epa.gov; [C.Y.] yoshimura.c.aa@m.titech.ac.jp

Type of submission: *Communication*

---

**Content**

- **Text 1:** Absence of VBNC bacteria in the prepared samples in this study
- **Table S1:** Comparison of current bacterial detection methods with the current study
- **Table S2** Comparison of this study and previous studies on cell quantification using BacLight Kit and fluorometer.
- **Fig. S1** Fluorescence microscopy images of SYTO 9 and PI-stained 0.22  $\mu$ m-membrane filtered river water sample.
- **Fig. S2** Procedures for preparing living and dead cell suspensions.
- **Fig. S3** Preprocessed spectra of E. coli suspended in those water matrices.
- **Fig. S4** Linear regression models of SYTO 9 peak areas in different regions against cell count in five types of water and their R-squared values.
- **Fig. S5** Nonlinear regression models of ratio or adjusted ratios between SYTO 9 and PI peak areas across 510-540 nm and 620-650 nm, respectively, against logarithmic cell count in five types of water.

### **Text 1: Absence of VBNC bacteria in the prepared samples in this study**

Previous studies reported that free soluble copper (0.05 mM or higher, equivalent to 3.2 mg/L or higher) could reduce bacterial culturability (within 1 day or 1 hour) <sup>10,11</sup>. However, surveys on the Tama River and treated wastewater along Tama River showed that the concentrations of heavy metals (Cd, Co, Cu, Mn, Mo, Ni, Pb, V, Zn, and Al) were at the level of µg/L or not detectable <sup>12,13</sup>, much lower than the concentrations used to induce VBNC bacteria in previous studies. Liu *et al.*<sup>14</sup> designed experiments to understand the induction of *E. coli* O157:H7 into VBNC state in environmental waters (e.g., river water), and showed that *E. coli* O157:H7 could survive in a culturable state for weeks in river water at 25 °C. In this study, the sample preparation and analysis were completed within one day at 25 °C. Therefore, it is reasonable to assume no induction of VBNC bacteria within the experimental time and condition in our study.

**Table S1 Comparison of current bacterial detection methods with the current study**

| <b>Method</b>                  | <b>Time to detection</b> | <b>LOD (bacteria/mL)</b> | <b>Disadvantages</b>                                                                                                                                     | <b>References</b> |
|--------------------------------|--------------------------|--------------------------|----------------------------------------------------------------------------------------------------------------------------------------------------------|-------------------|
| Plate count                    | days                     | 1-10                     | <ul style="list-style-type: none"><li>▪ Only detect culturable bacteria</li><li>▪ Time-consuming</li></ul>                                               | 1,2               |
| ATP measurements               | Minutes                  | 1-10                     | <ul style="list-style-type: none"><li>▪ Overestimation due to extracellular ATP</li><li>▪ Low reproducibility</li></ul>                                  | 3,4               |
| Quantitative PCR               | Hours                    | 1-10                     | <ul style="list-style-type: none"><li>▪ Difficulty in selection of indicator gene</li><li>▪ Complex procedures and high cost</li></ul>                   | 5,6               |
| Fluorescence microscopy        | Hours                    | $< 10^4$                 | <ul style="list-style-type: none"><li>▪ Time-consuming</li><li>▪ Inability to deal with complex water</li></ul>                                          | 1                 |
| Flow cytometry                 | Minutes                  | $10^4$                   | <ul style="list-style-type: none"><li>▪ High facility cost and technical requirement</li><li>▪ Sophisticated data analysis</li></ul>                     | 1,7               |
| Fluorescence microplate reader | Minutes                  | $10^6$                   | <ul style="list-style-type: none"><li>▪ High detection limit</li><li>▪ Can only measure at specific wavelengths</li></ul>                                | 8,9               |
| Fluorescence spectroscopy      | Minutes                  | $10^4$ - $10^5$          | <ul style="list-style-type: none"><li>▪ Requirement of calibration for each water matrix</li><li>▪ Currently only verified with <i>E. coli</i></li></ul> | This study        |

**Table S2** Comparison of this study and previous studies on cell quantification using BacLight Kit and fluorometer.

| Target water                                                                                                                                                                                                     | Target bacteria                                                                                                                                             | Analytical equipment      | Excitation wavelength | Emission range used for peak integration | Model type                                                                                                                                                         | Model variables                                            |                                                                         | R <sup>2</sup>                                                                                                                                                                                                   | LOD (bacteria/mL)                                                                                                                                                          | Reference                         |
|------------------------------------------------------------------------------------------------------------------------------------------------------------------------------------------------------------------|-------------------------------------------------------------------------------------------------------------------------------------------------------------|---------------------------|-----------------------|------------------------------------------|--------------------------------------------------------------------------------------------------------------------------------------------------------------------|------------------------------------------------------------|-------------------------------------------------------------------------|------------------------------------------------------------------------------------------------------------------------------------------------------------------------------------------------------------------|----------------------------------------------------------------------------------------------------------------------------------------------------------------------------|-----------------------------------|
|                                                                                                                                                                                                                  |                                                                                                                                                             |                           |                       |                                          |                                                                                                                                                                    | Independent variable                                       | Dependent variable                                                      |                                                                                                                                                                                                                  |                                                                                                                                                                            |                                   |
| <ul style="list-style-type: none"> <li>▪ Minimal A salts medium with 0.2% glucose</li> <li>▪ 0.85% saline solution</li> </ul>                                                                                    | <i>E. coli</i>                                                                                                                                              | Optrode system            | NA                    | 505-515 nm<br>600-610 nm                 | Linear regression                                                                                                                                                  | Percentage of live cells measured by flow cytometry (%)    | Ratio <sup>a</sup> or adjusted ratio <sup>b</sup> of fluorescence peaks | <ul style="list-style-type: none"> <li>▪ 0.96, 0.99</li> <li>▪ 0.52, 0.62</li> </ul>                                                                                                                             | <ul style="list-style-type: none"> <li>▪ 10<sup>6</sup></li> <li>▪ 10<sup>7</sup></li> </ul>                                                                               | <sup>11</sup>                     |
| 0.85% saline solution                                                                                                                                                                                            | <i>E. coli</i>                                                                                                                                              | Optrode system            | 473 nm                | 509-529 nm<br>609-629 nm                 | <ul style="list-style-type: none"> <li>▪ Principle component regression</li> <li>▪ Partial least square regression</li> <li>▪ Support vector regression</li> </ul> | Flow cytometry counts of live cells (cells/mL)             | Integrated SYTO 9 intensity                                             | <ul style="list-style-type: none"> <li>▪ 0.77</li> <li>▪ 0.87</li> <li>▪ 0.84</li> </ul>                                                                                                                         | 10 <sup>6</sup>                                                                                                                                                            | <sup>6</sup>                      |
| Saline solution                                                                                                                                                                                                  | <i>E. coli</i>                                                                                                                                              | Optrode system            | 473 nm                | The full spectral data was used          | <ul style="list-style-type: none"> <li>▪ Single-spectrum support vector regression</li> <li>▪ Multi-spectra support vector regression</li> </ul>                   | Percentage of live bacteria measured by flow cytometry (%) | Full-spectrum                                                           | <ul style="list-style-type: none"> <li>▪ 0.85 and 0.91 for 10<sup>8</sup> and 10<sup>7</sup> bacteria/ml samples.</li> <li>▪ 0.87 and 0.91 for 10<sup>8</sup> and 10<sup>7</sup> bacteria/ml samples.</li> </ul> | 10 <sup>6</sup>                                                                                                                                                            | <sup>12</sup>                     |
| Peptone water (0.1% peptone, 0.85% sodium chloride, pH 7)                                                                                                                                                        | <ul style="list-style-type: none"> <li>▪ <i>E. coli</i></li> <li>▪ <i>S. Typhimurium</i></li> <li>▪ <i>S. aureus</i></li> <li>▪ <i>B. cereus</i></li> </ul> | Optrode system            | 473 nm                | 490-590 nm <sup>c</sup>                  | Linear regression                                                                                                                                                  | Logarithm of bacterial cell (Log (CFU/mL))                 | Logarithm of fluorescence intensity (490-590 nm)                        | NA                                                                                                                                                                                                               | <ul style="list-style-type: none"> <li>▪ 10<sup>5</sup></li> <li>▪ 10<sup>5</sup></li> <li>▪ 10<sup>5</sup></li> <li>▪ 10<sup>3</sup></li> </ul>                           | <sup>13</sup>                     |
| 0.85% saline solution                                                                                                                                                                                            | <ul style="list-style-type: none"> <li>▪ <i>E. coli</i></li> <li>▪ <i>S. aureus</i></li> </ul>                                                              | Fluorescence spectroscopy | 470 nm                | 510-540 nm<br>620-650 nm                 | Linear regression                                                                                                                                                  | Percentage of live cells                                   | Ratio <sup>a</sup> of fluorescence peaks                                | NA                                                                                                                                                                                                               | NA                                                                                                                                                                         | The Live/Dead BacLight kit manual |
| <ul style="list-style-type: none"> <li>▪ 0.85% saline solution (SA)</li> <li>▪ Tama River water (TM)</li> <li>▪ Nomi River water (NM)</li> <li>▪ Mixture of SA and TM</li> <li>▪ Mixture of SA and NM</li> </ul> | <i>E. coli</i>                                                                                                                                              | Fluorescence spectroscopy | 470 nm                | 500-510 nm<br>595-605 nm                 | Linear regression                                                                                                                                                  | Viable cell plate count (CFU/mL)                           | Integrated SYTO 9 intensity                                             | <ul style="list-style-type: none"> <li>▪ 0.96</li> <li>▪ 0.99</li> <li>▪ 0.99</li> <li>▪ 1.00</li> <li>▪ 0.99</li> </ul>                                                                                         | <ul style="list-style-type: none"> <li>▪ 10<sup>4</sup></li> <li>▪ 10<sup>4</sup></li> <li>▪ 10<sup>4</sup></li> <li>▪ 10<sup>5</sup></li> <li>▪ 10<sup>4</sup></li> </ul> | This study                        |

<sup>a</sup> The ratio of the integrated intensity of SYTO 9 peak to PI peak.  $Ratio = \frac{SYTO\ 9}{PI}$ .

<sup>b</sup> The adjusted ratio was proposed as Adjusted ratio =  $\frac{100 \times Ratio}{1 + Ratio}$ .

<sup>c</sup> Only SYTO 9 was applied to stain samples.

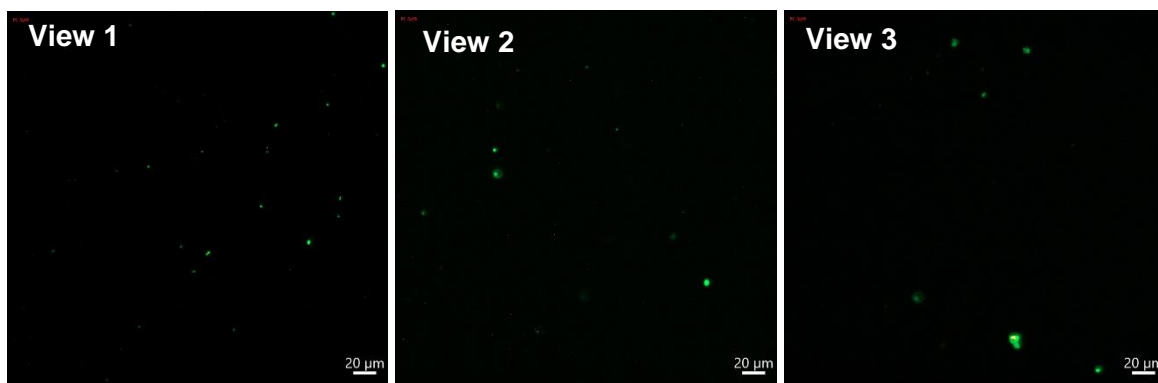

**Fig. S1** Fluorescence microscopy images of SYTO 9 and PI-stained 0.22  $\mu\text{m}$ -membrane filtered Tama River water. The three panels are different views of one sample. The stained sample (5  $\mu\text{L}$ ) was placed on an agarose gel-coated glass slide and covered by a square coverslip. The images were acquired under an Inverted Phase Contrast Fluorescence Microscope (Axio Observer Z1, ZEISS<sup>TM</sup>, Germany) equipped with fluorescence filter cubes GFP (Excitation at 450-490 nm; Emission at 500-550 nm) and DsRed (Excitation at 538-562 nm; Emission at 570-640 nm), at a total magnification up to 400 $\times$  (objective lens of 40 $\times$  and eyepiece of 10 $\times$ ).

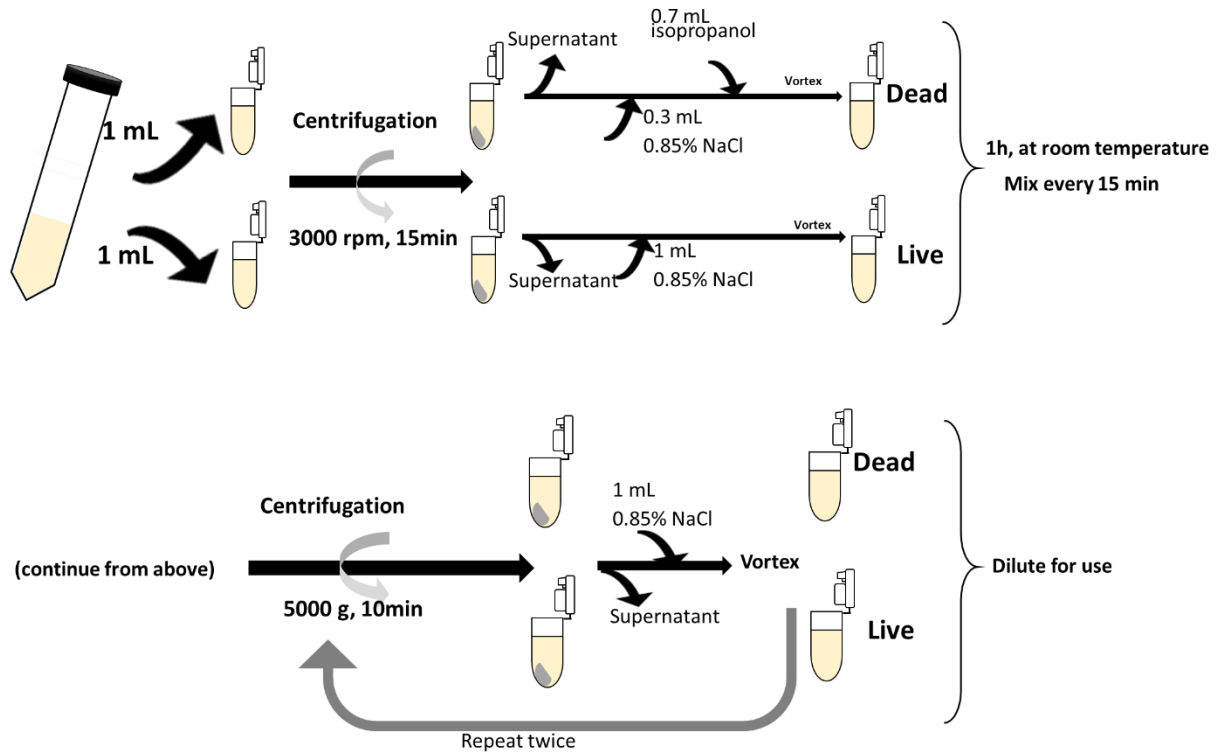

**Fig. S2** Procedures for preparing living and dead cell suspensions (BacLight Kit manual with modifications).

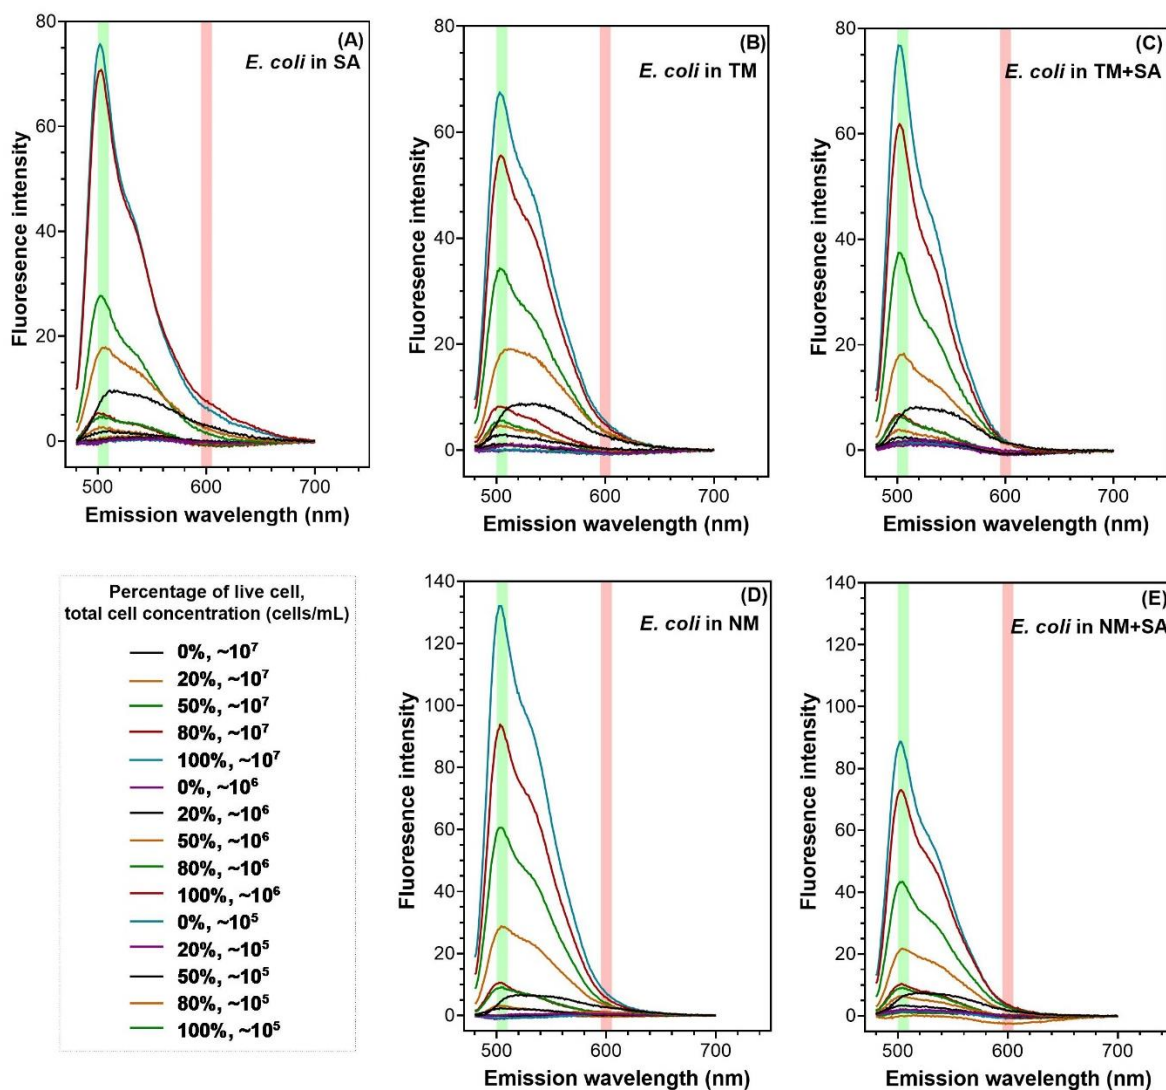

**Fig. S3** Preprocessed spectra of *E. coli* suspended in those water matrices. The green and red ribbons indicate the fluorescence emission peaks of SYTO 9 and PI, respectively. The spectra were acquired by fixing the excitation wavelength at 470 nm. The fluorescence emission spectrum of *E. coli* suspension was the average of triplicate measurements, and the background spectrum of the water matrix was subtracted.

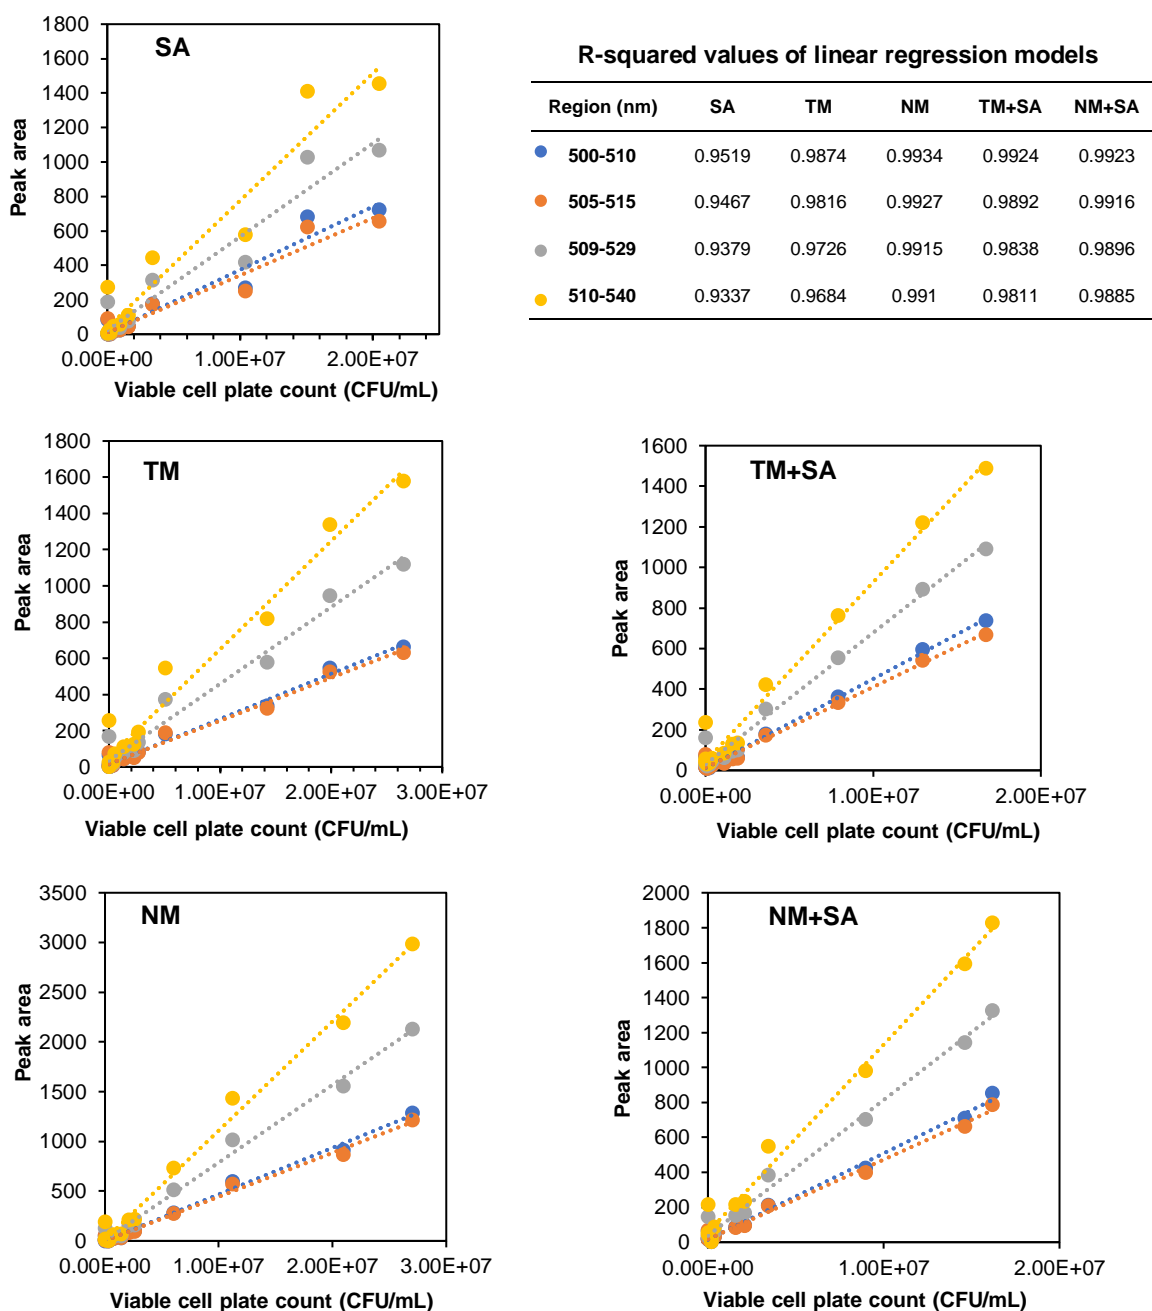

**Fig. S4** Linear regression models of SYTO 9 peak areas in different regions against cell count in five types of water and their R-squared values. The peak area was calculated using the preprocessed spectra (i.e. the background spectrum was removed). SA: 0.85% saline solution; TM: Tama River water; NM: Nomi River water; TM+SA: the mixture of Tama River water and 0.85% saline solution; NM+SA: the mixture of Nomi River water and 0.85% saline solution.



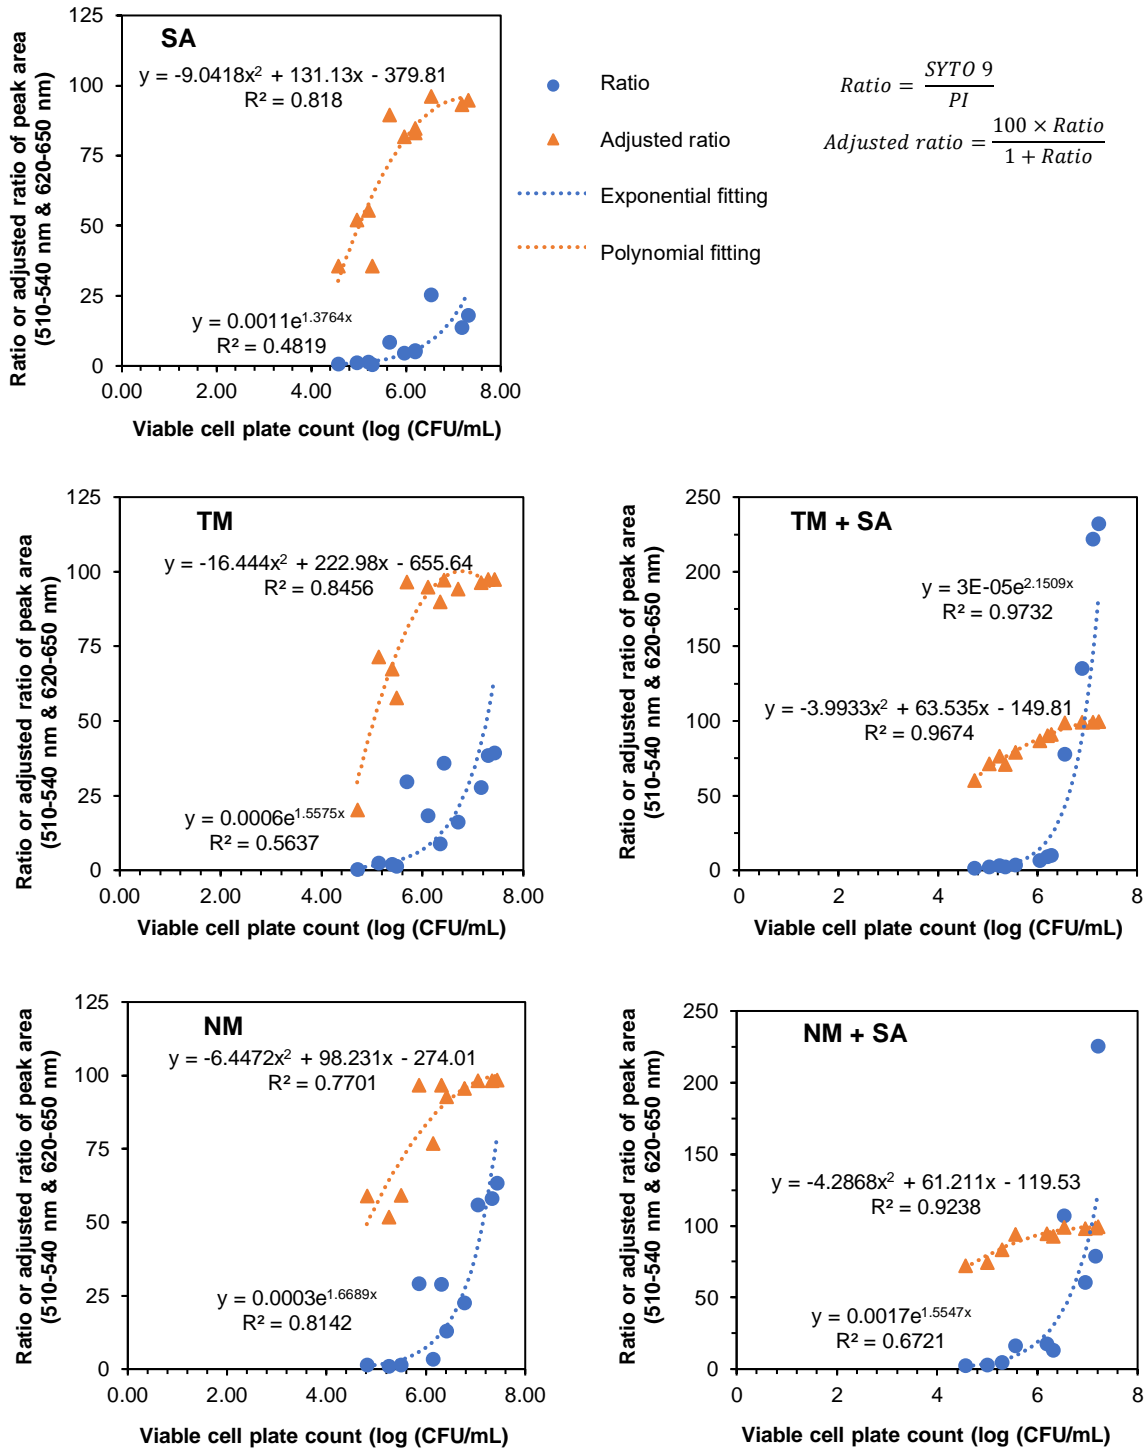

**Fig. S5** Nonlinear regression models of ratio or adjusted ratios between SYTO 9 and PI peak areas across 510-540 nm and 620-650 nm, respectively, against logarithmic cell count in five types of water. The peak regions and ratio calculation were based on the BacLight Kit instructions, while the adjusted ratio was proposed by a previous study<sup>10</sup>. SA: 0.85% saline solution; TM: Tama River water; NM: Nomi River water; TM+SA: the mixture of Tama River water and 0.85% saline solution; NM+SA: the mixture of Nomi River water and 0.85% saline solution.

## References

1. Wang, Y., Hammes, F., De Roy, K., Verstraete, W. & Boon, N. Past, present and future applications of flow cytometry in aquatic microbiology. *Trends in Biotechnology* **28**, 416–424 (2010).
2. Allen, M. J., Edberg, S. C. & Reasoner, D. J. Heterotrophic plate count bacteria - What is their significance in drinking water? *Int. J. Food Microbiol.* **92**, 265–274 (2004).
3. Emerson, J. B. *et al.* Schrödinger’s microbes: Tools for distinguishing the living from the dead in microbial ecosystems. *Microbiome* **5**, 86 (2017).
4. Venkateswaran, K., Hattori, N., La Duc, M. T. & Kern, R. ATP as a biomarker of viable microorganisms in clean-room facilities. *J. Microbiol. Methods* **52**, 367–377 (2003).
5. Luedtke, B. E. & Bosilevac, J. M. Comparison of methods for the enumeration of enterohemorrhagic Escherichia coli from veal hides and carcasses. *Front. Microbiol.* **0**, 1062 (2015).
6. Ou, F., McGoverin, C., Swift, S. & Vanholsbeeck, F. Near real-time enumeration of live and dead bacteria using a fibre-based spectroscopic device. *Sci. Rep.* **9**, 1–10 (2019).
7. Hammes, F. *et al.* Flow-cytometric total bacterial cell counts as a descriptive microbiological parameter for drinking water treatment processes. *Water Res.* **42**, 269–277 (2008).
8. Alakomi, H. L., Mättö, J., Virkajärvi, I. & Saarela, M. Application of a microplate scale fluorochrome staining assay for the assessment of viability of probiotic preparations. *J. Microbiol. Methods* **62**, 25–35 (2005).
9. Feng, J., Wang, T., Zhang, S., Shi, W. & Zhang, Y. An Optimized SYBR Green I/PI Assay for Rapid Viability Assessment and Antibiotic Susceptibility Testing for

- Borrelia burgdorferi. *PLoS One* **9**, e111809 (2014).
10. Ou, F., McGoverin, C., Swift, S. & Vanholsbeeck, F. Rapid evaluation of bacterial viability using the optrode - A near real time portable fluorimeter. in *Optics InfoBase Conference Papers AW3C.6* (OSA - The Optical Society, 2016).  
doi:10.1364/ACOFT.2016.AW3C.6
  11. Robertson, J., McGoverin, C., Vanholsbeeck, F. & Swift, S. Optimisation of the protocol for the liVE/DEAD®BacLight™ bacterial viability kit for rapid determination of bacterial load. *Front. Microbiol.* **10**, 1–13 (2019).
  12. Ou, F., McGoverin, C., Swift, S. & Vanholsbeeck, F. Rapid and cost-effective evaluation of bacterial viability using fluorescence spectroscopy. *Anal. Bioanal. Chem.* **411**, 3653–3663 (2019).
  13. McGoverin, C., Robertson, J., Jonmohamadi, Y., Swift, S. & Vanholsbeeck, F. Species Dependence of SYTO 9 Staining of Bacteria. *Front. Microbiol.* **11**, 1–11 (2020).
